# Supplementary material for: Draft genome sequence of Cicer reticulatum L., the wild progenitor of chickpea provides a resource for agronomic trait improvement
Source: PubMed Central journal article supplement — DNA Res. 2016 Aug 26;24(1):1–10. doi: 10.1093/dnares/dsw042 (PMC5381347; doi:10.1093/dnares/dsw042), 2016-08-26
Supplement: dsw042_Supp.pdf [file dsw042_Supp.pdf]

**Draft genome sequence of *Cicer reticulatum* L., the wild progenitor of chickpea provides a resource for agronomic trait improvement**

## **SUPPORTING FIGURES**

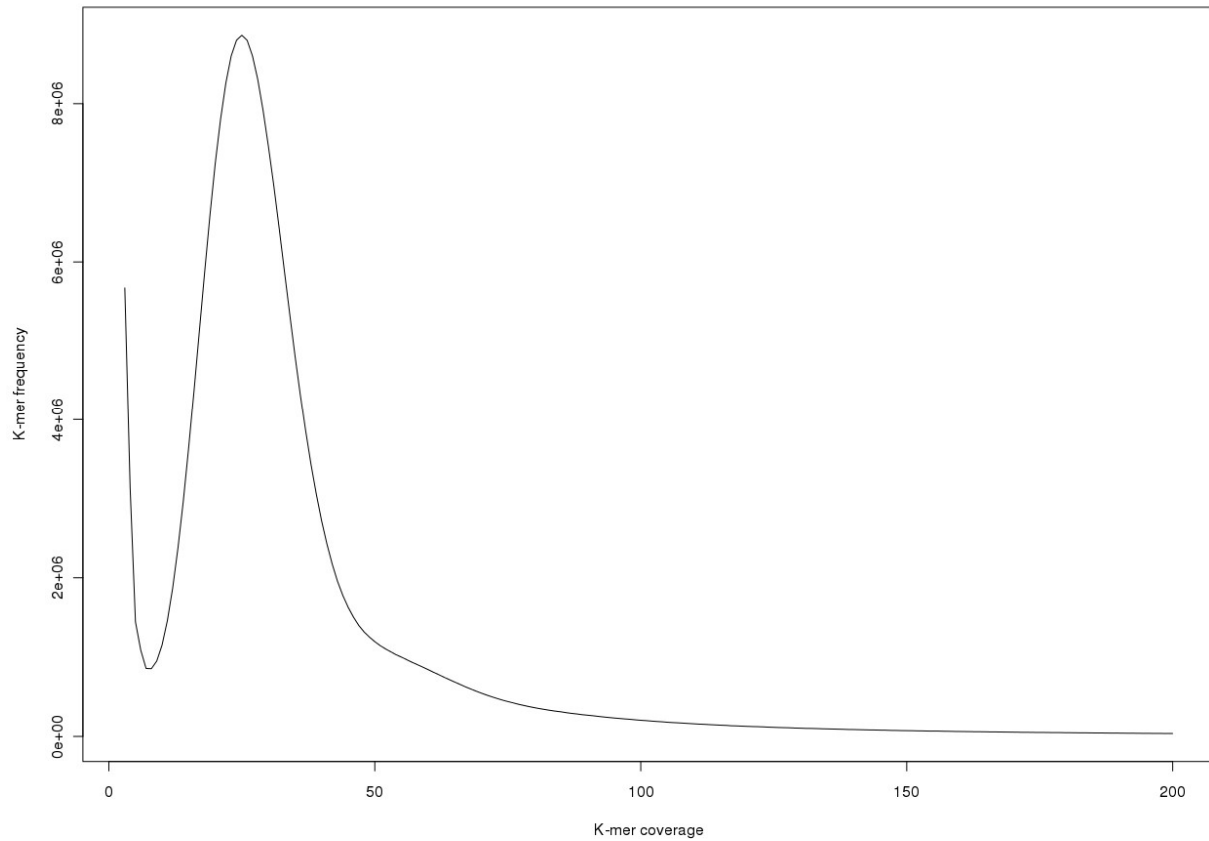

| k-mer | k-mer Depth | Total Base used | Avg. Read Len (base) | Estimated Genome Size(bp) |
|-------|-------------|-----------------|----------------------|---------------------------|
| 17    | 29          | 27,588,914,368  | 101                  | 802,003,324               |

$$N = M * L / (L - K + 1); \text{Genome size} = T / N$$

$$M=29; L=101; K=17; T=27,588,914,368$$

**Figure S1:** Estimation of chickpea genome size based on k-mer distribution obtained from Jellyfish.

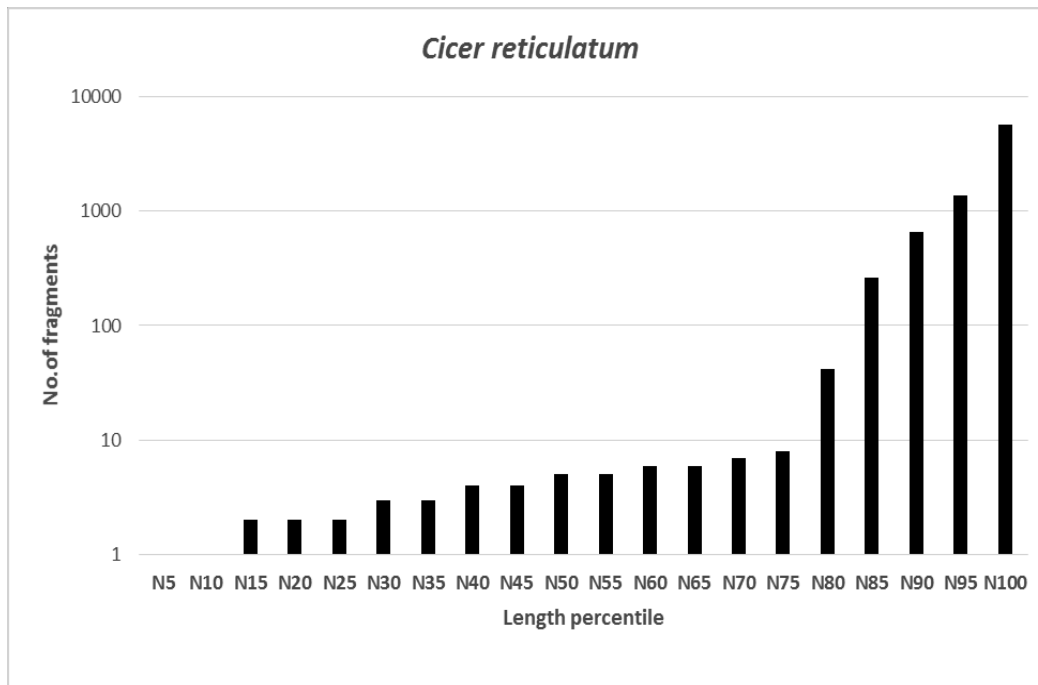

**Figure S2.** Fragment distribution of *C. reticulatum* genome assembly. Number of fragments covering different percentile of the assembly plotted against different length percentile.

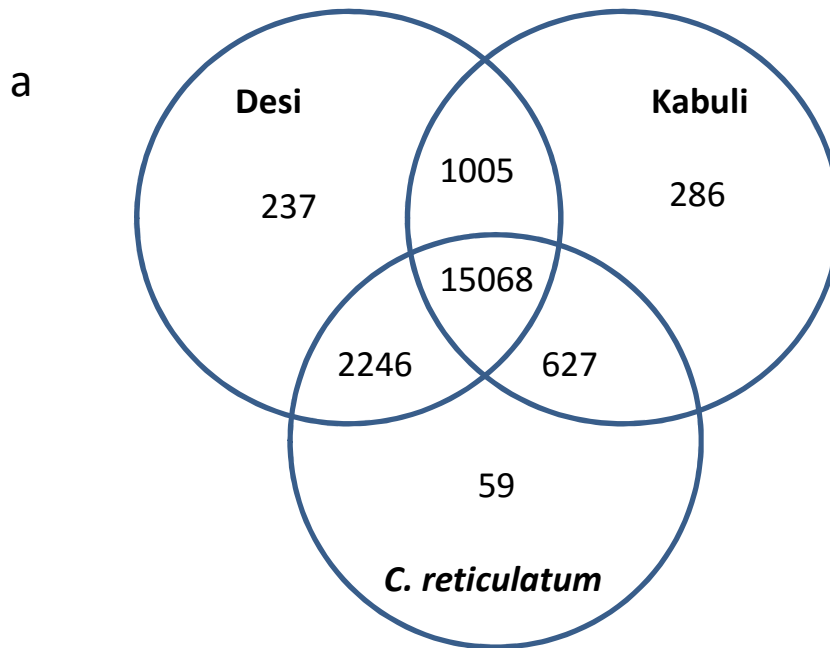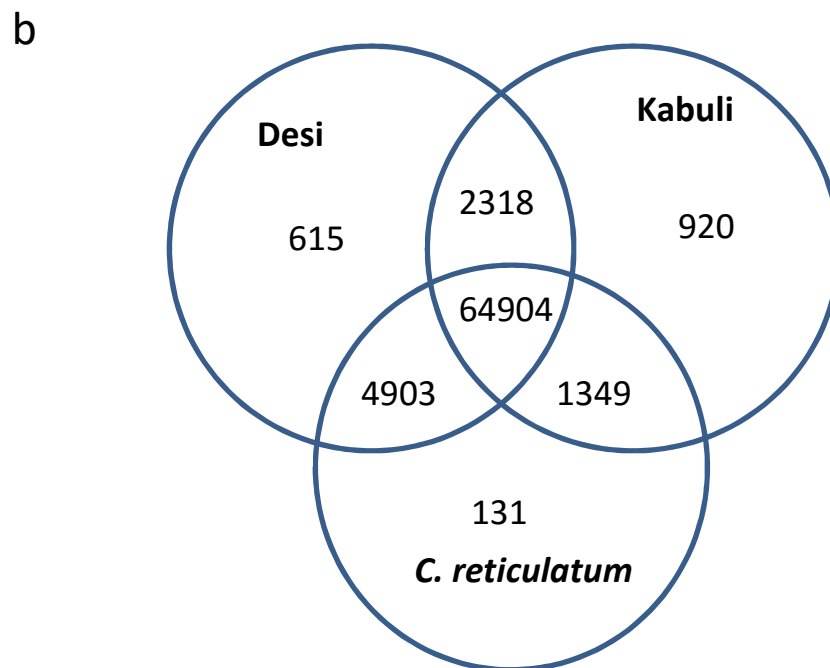

**Figure S3.** Venn diagram showing clustering of gene families (a) and genes (b) shared among Chickpea cultivars ICC4958 (Desi) and CDC Frontier (Kabuli) and wild chickpea *C. reticulatum*.

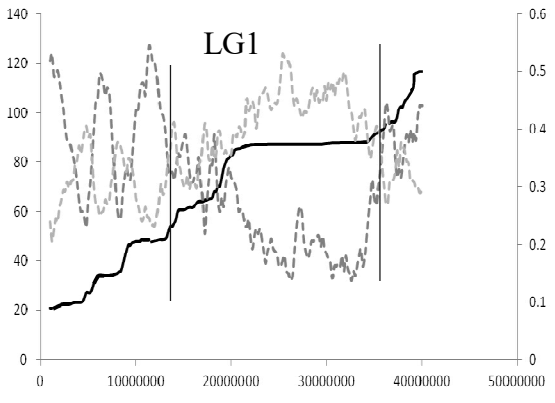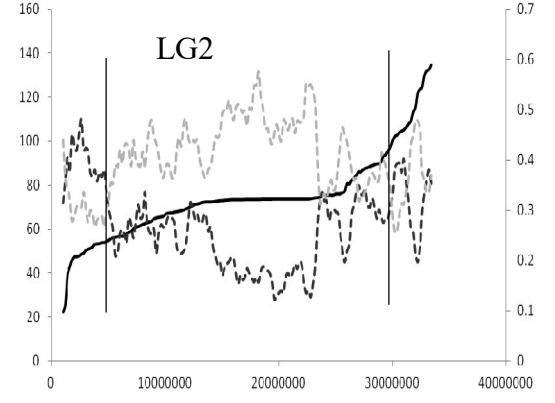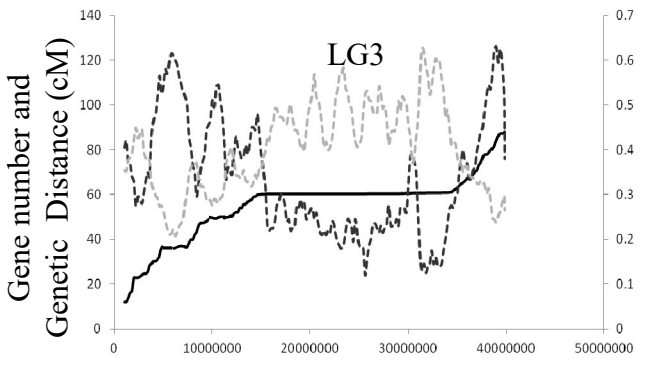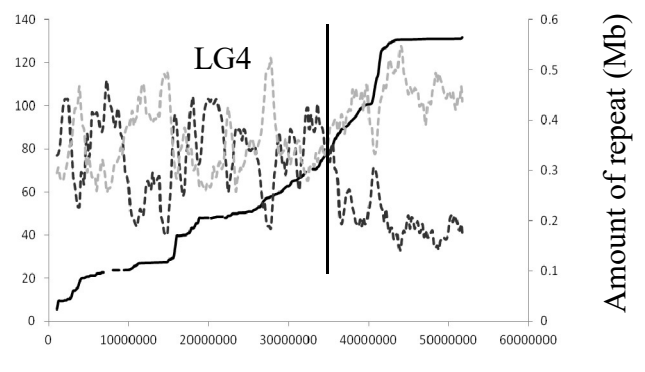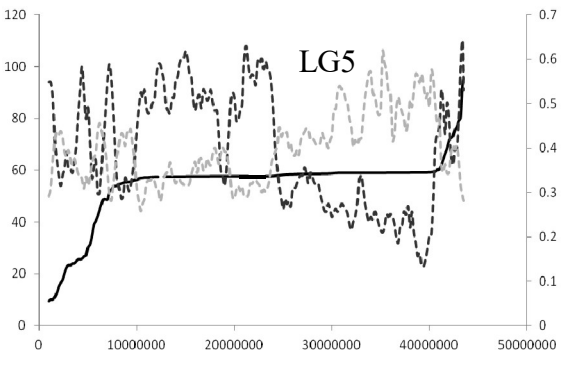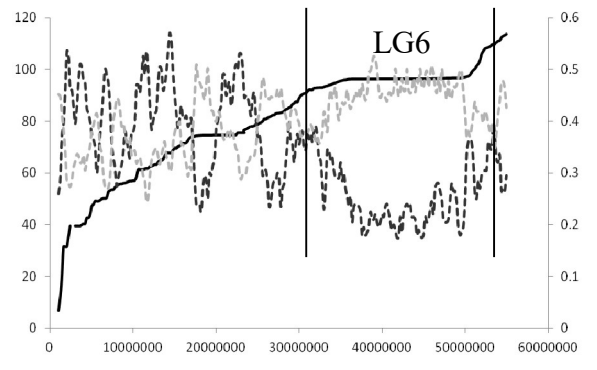

Physical distance (bases)

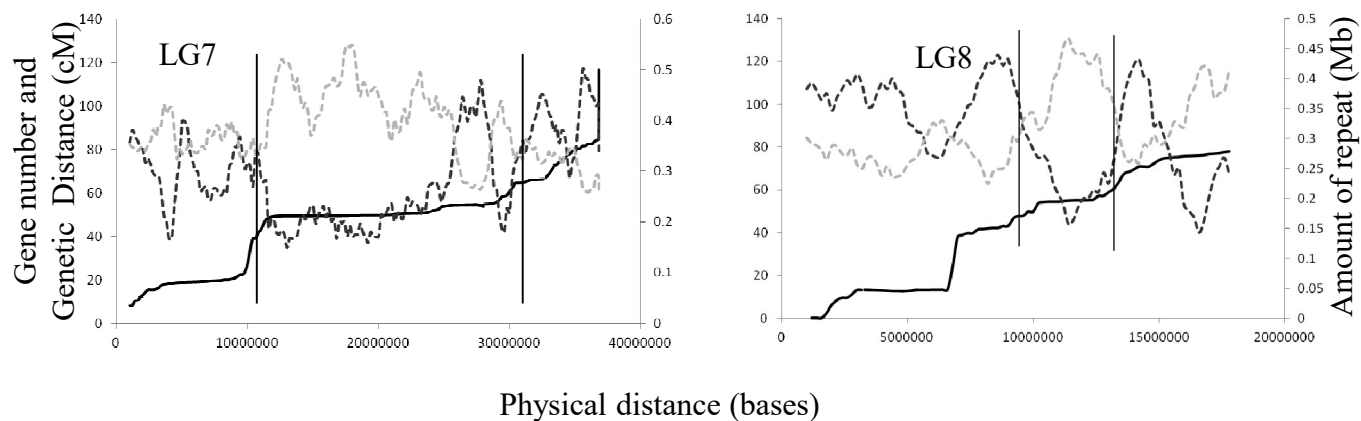

**Figure S4.** Multidimensional topography of linkage groups of *Cicer reticulatum*. Delineation of pericentromeric regions of LG1-8 was marked based on comparison of physical distance (X-axis) with gene density (left Y-axis, black dotted line), repeat density (right Y-axis, grey dotted line) and average genetic distance (Y-axis, black line). Vertical bars indicate position of transition from euchromatic region to pericentromeric region.

*C. arietinum* ICC4958

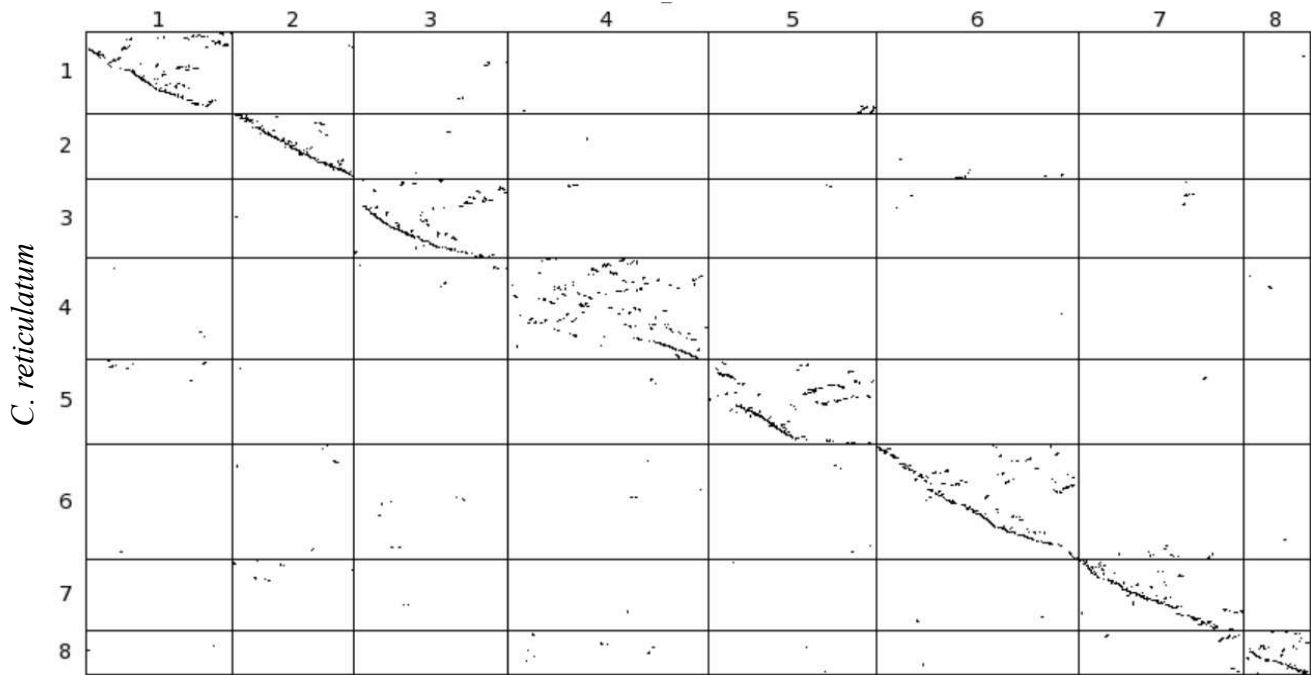

**Figure S5.** Comparison of *C. reticulatum* and *C. arietinum* ICC4958 chickpea genome assemblies. A dot-plot matrix comparing the chickpea (ICC 4958) and the *C. reticulatum* draft assemblies of eight pseudomolecules corresponding to each linkage groups. Pairwise comparison of all the pseudomolecules two draft genome assemblies were performed using synteny blocks and anchor filtering algorithms of tool SyMap v4.0.

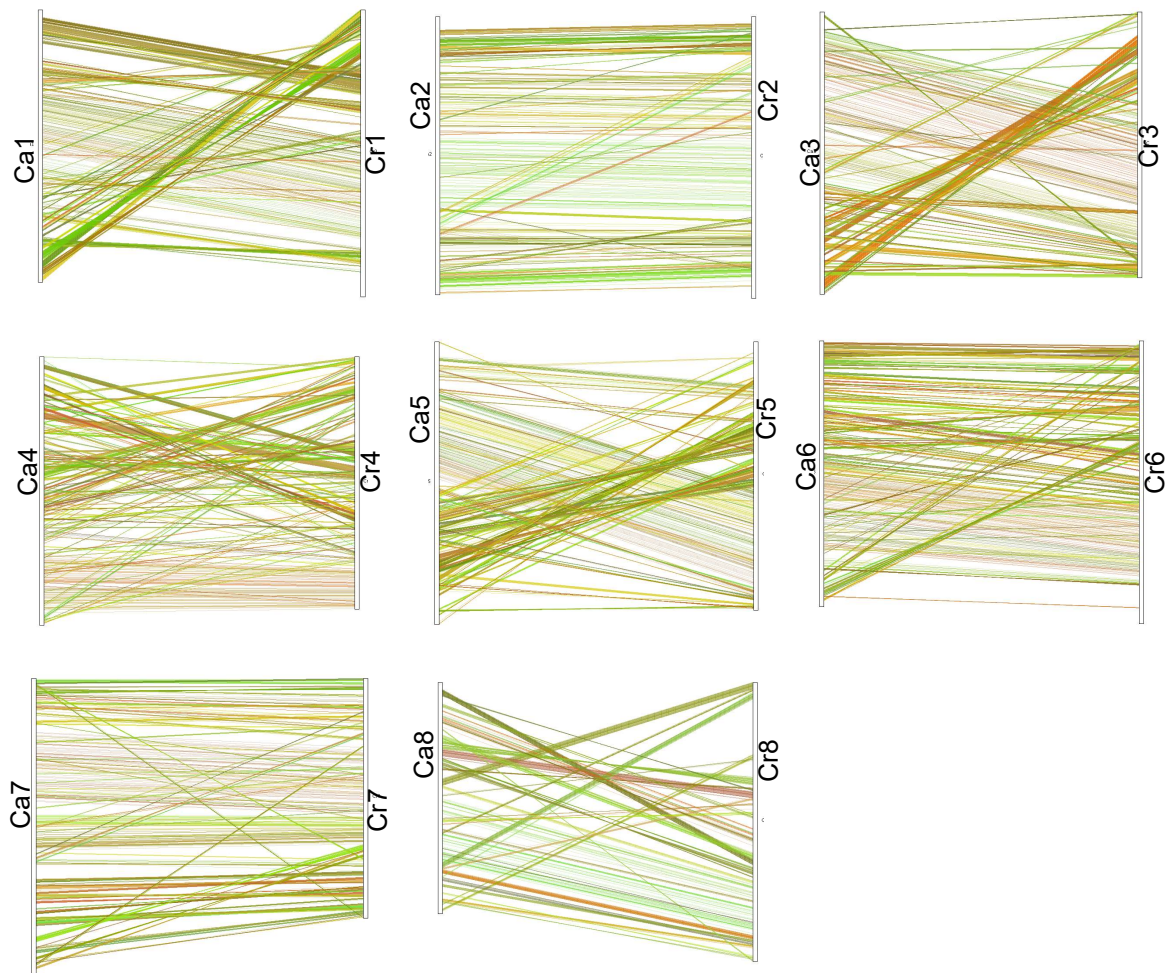

**Figure S6.** Pairwise collinearity analysis of orthologous genes present in the linkage groups of *desi* (Ca1-8) and *C. reticulatum* (Cr1-8) draft assemblies. Analysis was performed using default parameters of tool MCScanX.





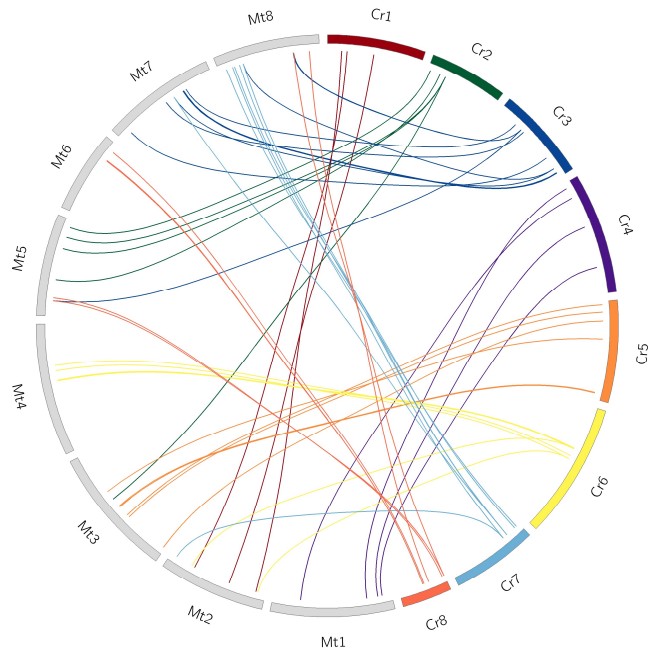

**Figure S8.** Pairwise collinearity analysis of resistance gene homologues present in the linkage groups of *M. truncatula* (Mt1-8) and *C. reticulatum* (Cr1-8) assemblies. Analysis was performed using default parameters of tool MCScanX and viewed using Circose.

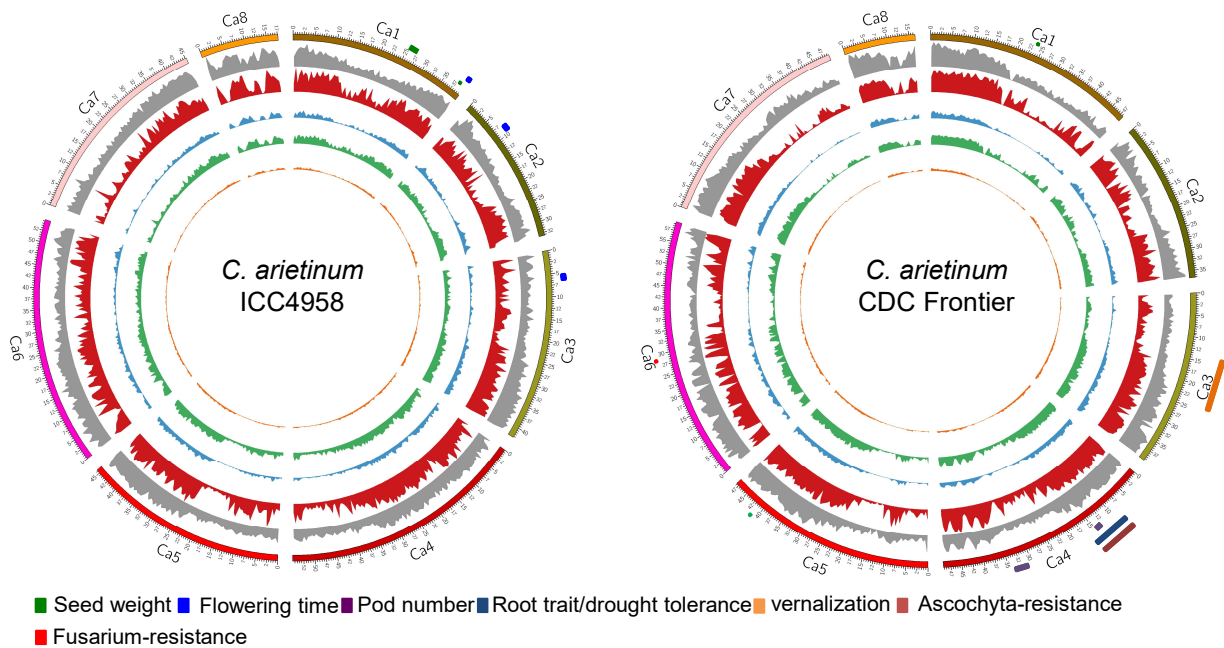

**Figure S9** :Genome-wide distribution of sequence diversity (SNP/Indels) between the wild and the domesticated chickpea genotypes. Sequence reads of *C. reticulatum* were mapped on the pseudomolecules of *desi* (ICC4958) and *kabuli* (CDC Frontier) chickpeas. Circular maps show distribution of densities (in 0.5 Mb) of genes (grey), genomic SNPs (red), SNPs present in genes only (blue), genomic indels (green) and indels present in genes only. SNP and indel scales were kept as 5000 and 2500, respectively. Physical locations of quantitative trait loci (QTL) for different traits, available from literature, are shown as colored bars outside the circles.

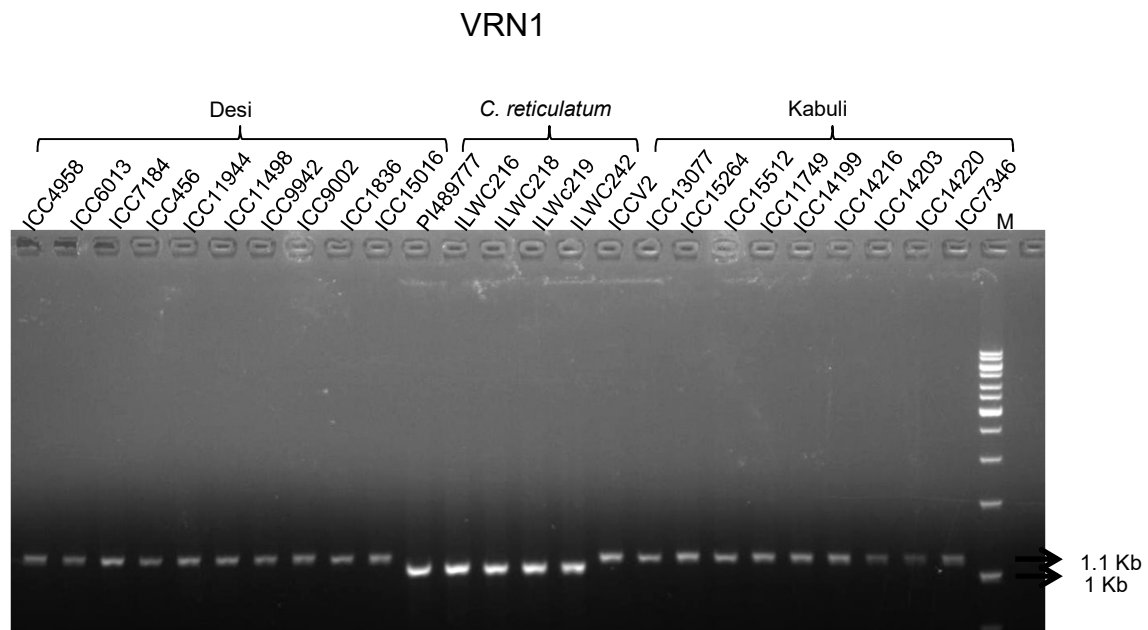

**Figure S10.** Amplification of the polymorphic sequence present at the 5'UAS of the VRN1 Orthologues in different accessions of the domesticated (*desi* and *kabuli* types) and wild (*C. reticulatum*) chickpeas. Accessions numbers are mentioned above.

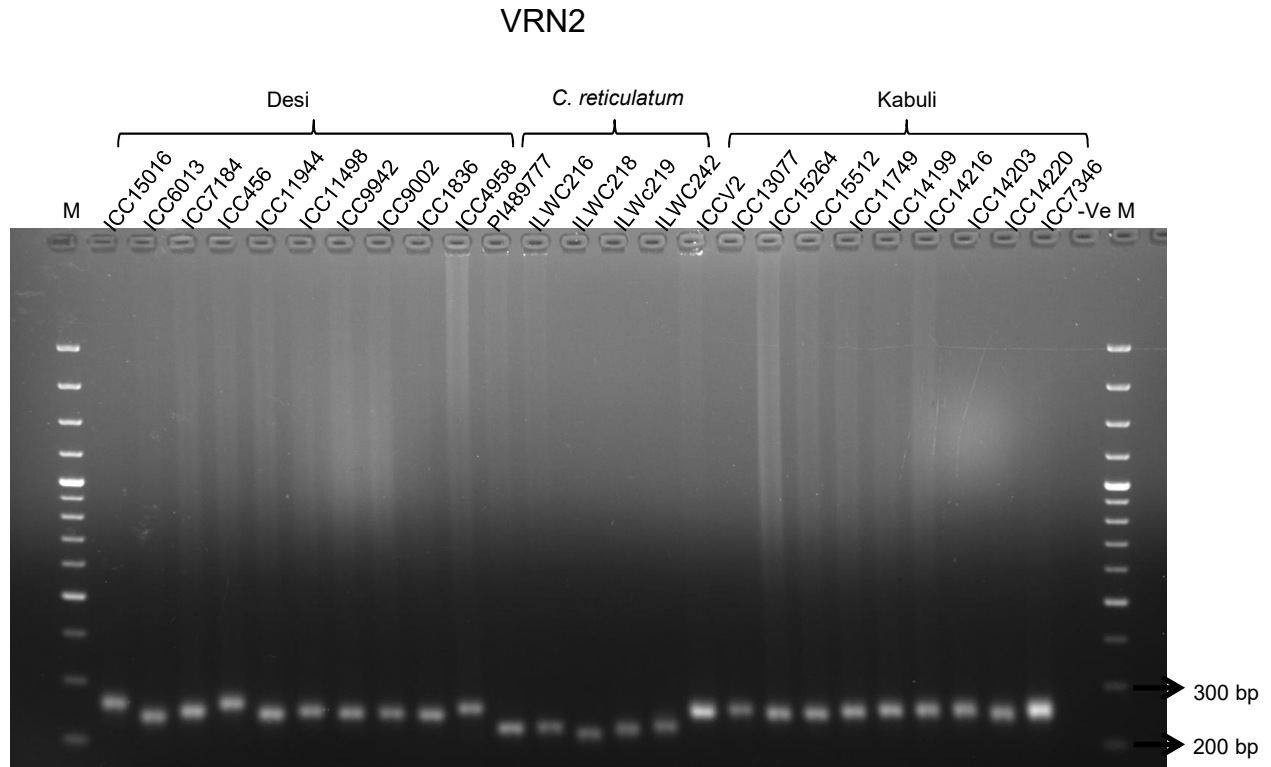

**Figure S11.** Amplification of the polymorphic sequence present at the 5'UAS of the VRN2 orthologues in different accessions of the domesticated (*desi* and *kabuli* types) and wild (*C. reticulatum*) chickpeas. Accession numbers are mentioned above.

**Draft genome sequence of *Cicer reticulatum* L., the wild progenitor of chickpea provides a resource for agronomic trait improvement**

**SUPPORTING TABLES**

**Table S1. Sequencing data generated for *Cicer reticulatum* PI489777.**

Sequence generated using Illumina HiSeq 1000 sequencing platform (WGS, Whole genome shotgun. MP, Mate-pair)

| Library type | Av. Frg. Length (bp) | Total bases     | Filtered      | Filtered   |
|--------------|----------------------|-----------------|---------------|------------|
|              |                      |                 | Reads         | Bases (Gb) |
| WGS          | 180                  | 27,649,198,036  | 273,754,436   | 27.375     |
| WGS          | 500                  | 25,293,107,406  | 250,426,806   | 25.043     |
| MP           | 3000                 | 40,400,605,394  | 400,005,994   | 40.000     |
| MP           | 10000                | 27,678,782,552  | 274,047,352   | 27.404     |
| Total        |                      | 121,021,693,388 | 1,198.234,588 | 119.823    |

\*

**Table S2. Comparison of genome assembly using three assembly tools**

|                           | ALLPATHS-LG | SOAPdenovo2 | MaSuRCA     |
|---------------------------|-------------|-------------|-------------|
| No. of scaffolds          | 7383        | 39,625      | 14,315      |
| Min. Scaffold Length (bp) | 1000        | 1000        | 1000        |
| Max. Scaffold Length (bp) | 3,939,974   | 343,591     | 2,610,062   |
| Scaffold N50 Length (bp)  | 216,834     | 29,639      | 129,084     |
| Total span (bp)           | 416,562,993 | 448,927,573 | 420,395,857 |
| Valid bases (bp)          | 379,613,856 | 205,220,080 | 379,802,787 |

**Table S3. ALLPATH-LG assembly output**

|                                          | ALLPATH-LG assembly output |
|------------------------------------------|----------------------------|
| No. Scaffolds                            | 7383                       |
| Total span                               | 416,562,993                |
| Min. Scaffold length                     | 1000 bp                    |
| Max. Scaffold length                     | 3,939,974 bp               |
| Av. Scaffold length                      | 56421.91 bp                |
| Med. Scaffold length                     | 9973 bp                    |
| Scaffold N25 length                      | 530302 bp                  |
| Scaffold N50 length                      | 216834 bp                  |
| Scaffold N50 index                       | 427                        |
| No. of contigs                           | 35,261                     |
| Total contig bases                       | 378,554,873 bp             |
| Max. contig length                       | 309,892 bp                 |
| Contig N50 length                        | 23,121 bp                  |
| Estimated genome size                    | 817,640,084 bp             |
| Estimated repeat content (at K=25 scale) | 63%                        |
| Coverage                                 | 49X                        |

|                          |      |
|--------------------------|------|
| % of WGS reads assembled | 91.2 |
| % of MP reads assembled  | 19.2 |

**Table S4. Anchoring of scaffolds to linkage groups**

| Linkage groups | Markers mapped | No. of matched scaffolds | Assembled lengths of pseudomolecule |
|----------------|----------------|--------------------------|-------------------------------------|
| Cr_LG_1        | 597            | 174                      | 42,039,305                          |
| Cr_LG_2        | 483            | 222                      | 33,561,908                          |
| Cr_LG_3        | 520            | 218                      | 39,846,785                          |
| Cr_LG_4        | 749            | 249                      | 51,733,763                          |
| Cr_LG_5        | 623            | 225                      | 43,510,909                          |
| Cr_LG_6        | 694            | 302                      | 58,232,078                          |
| Cr_LG_7        | 472            | 187                      | 36,831,687                          |
| Cr_LG_8        | 232            | 74                       | 21,322,067                          |
| Total          | 4370           | 1651                     | 327,078,502                         |

**Table S5. Statistics of *C. reticulatum* assembly**

|                      |                |
|----------------------|----------------|
| No. Scaffolds        | 5723           |
| Total span           | 416,658,930 bp |
| Min. Scaffold length | 1000 bp        |
| Max. Scaffold length | 58,232,078 bp  |
| Av. Scaffold length  | 72600.57 bp    |
| Med. Scaffold length | 4237 bp        |
| N25 length           | 51,733,763 bp  |
| N50 length           | 39,846,785 bp  |
| N50 index            | 5              |
| Total contig bases   | 378,424,350 bp |
| Max. Contig length   | 309,892        |
| N50 contig           | 23.12 kb       |
| %GC                  | 27.55          |
| %N                   | 8.87           |

**Table S6. Statistics of *C. reticulatum* reads mapped back on assembly**

| Library  | Total reads  | Mapped      | % Mapped | Uniquely Mapped |
|----------|--------------|-------------|----------|-----------------|
| 180 bp   | 273,754,436  | 208,433,504 | 76.14    | 161,779,033     |
| 500 bp   | 250,426,806  | 182,806,783 | 73.00    | 133,632,360     |
| 3000 bp  | 400,005,994  | 185,146,932 | 46.29    | 132,288,117     |
| 10000 bp | 274,047,352  | 140,649,098 | 51.32    | 98,316,040      |
| Total    | 1,198,234,58 | 717,036,317 | 59.84    | 526,015,550     |



**Table S7. Statistics of reference-based *C. reticulatum* assembly**

|                                 | <b><i>C. reticulatum</i> on<br/>ICC4958</b> | <b><i>C. reticulatum</i> on CDC<br/>Frontier</b> |
|---------------------------------|---------------------------------------------|--------------------------------------------------|
| <b>LG 1</b>                     | 3,95,15,182                                 | 4,78,83,359                                      |
| <b>LG 2</b>                     | 3,28,63,583                                 | 3,62,43,916                                      |
| <b>LG 3</b>                     | 4,18,37,506                                 | 3,95,74,814                                      |
| <b>LG 4</b>                     | 5,45,07,455                                 | 4,87,29,341                                      |
| <b>LG 5</b>                     | 4,53,83,838                                 | 4,76,93,095                                      |
| <b>LG 6</b>                     | 5,43,37,838                                 | 5,88,90,561                                      |
| <b>LG 7</b>                     | 4,48,58,743                                 | 4,84,81,973                                      |
| <b>LG 8</b>                     | 1,74,87,649                                 | 1,63,41,866                                      |
| <b>LGs</b>                      | <b>330,791,794</b>                          | <b>343,838,925</b>                               |
| <b>Unanchored<br/>Scaffolds</b> | <b>109,392,978</b>                          | <b>78,011,200</b>                                |
| <b>Total</b>                    | <b>440,184,772</b>                          | <b>421,850,125</b>                               |

**Table S8: Polymorphic simple sequence repeats (SSR) between the wild and two domesticated chickpea draft assemblies and their flanking sequences (submitted as an excel file)**

**Table S9. Statistics of protein-coding gene annotation in *C. reticulatum* assembly**

|                                     |          |
|-------------------------------------|----------|
| Number of annotated gene            | 25,680   |
| Total gene length (kb)              | 85,786   |
| Average gene length (bp)            | 3340.89  |
| Average coding sequence length (bp) | 1192.195 |
| Number of mRNAs                     | 26,404   |
| Average mRNA length (bp)            | 3364.35  |
| Total exon length (kb)              | 34,181   |
| Average number of exons per mRNA    | 5.31     |
| Average number of exons per gene    | 5.76     |
| Average exon length (bp)            | 240      |
| Average intron length (bp)          | 384      |

**Table S10. Functional annotation of *C. reticulatum* protein-coding genes**

| <b>Database</b>                | <b>Number</b> | <b>Percentage</b> |
|--------------------------------|---------------|-------------------|
| NCBI ntdb   Trembl   Uniref100 | 24769         | 96.45%            |
| Swissprot                      | 17715         | 68.98%            |
| TAIR                           | 20734         | 83.74%            |
| KEGG                           | 6888          | 26.82%            |
| Total Annotated <sup>1</sup>   | 25075         | 97.64%            |

**Table S11. Sequence similarity of *C. reticulatum* genes to those of *C. arietinum* ICC4958 (*Desi*) and CDC Frontier (*Kabuli*)**

**Query coverage=100%, Identity=100%**

|                | <b>ICC4958</b> | <b>CDC Frontier</b> |
|----------------|----------------|---------------------|
| <b>CDS</b>     | 4033           | 3087                |
| <b>Protein</b> | 6969           | 5003                |

**Query coverage=90%, Identity=95%**

|                | <b>ICC4958</b> | <b>CDC Frontier</b> |
|----------------|----------------|---------------------|
| <b>CDS</b>     | 20097          | 17597               |
| <b>Protein</b> | 18035          | 15227               |

**Query coverage=80%, Identity=95%**

|                | <b>ICC4958</b> | <b>CDC Frontier</b> |
|----------------|----------------|---------------------|
| <b>CDS</b>     | 21475          | 19170               |
| <b>Protein</b> | 18876          | 16296               |

**Table S12. *C. reticulatum* statistics of euchromatic and pericentromeric region determination.**

| <b>Chromosome</b>            |                        |                       |                             |                           |
|------------------------------|------------------------|-----------------------|-----------------------------|---------------------------|
|                              | <b>Physical Length</b> | <b>Genetic Length</b> | <b>Kb/cM per chromosome</b> | <b>Total No, of Genes</b> |
| <b>Chr1</b>                  | 42039305               | 150.98                | 278.44                      | 3087                      |
| <b>Chr2</b>                  | 33561908               | 154.53                | 217.19                      | 2053                      |
| <b>Chr3</b>                  | 39846785               | 91.04                 | 437.68                      | 2685                      |
| <b>Chr4</b>                  | 51733763               | 134.14                | 385.67                      | 3518                      |
| <b>Chr5</b>                  | 43510909               | 114.46                | 380.14                      | 2944                      |
| <b>Chr6</b>                  | 58232078               | 125.64                | 463.48                      | 3837                      |
| <b>Chr7</b>                  | 36831687               | 179.82                | 204.83                      | 2493                      |
| <b>Chr8</b>                  | 21322067               | 96.21                 | 221.62                      | 1875                      |
| <b>Total</b>                 | 327078502              |                       |                             | 22492                     |
| <b>Average</b>               |                        |                       | 323.6317343                 |                           |
| <b>Percentage</b>            |                        |                       |                             |                           |
| <b>Pericentromere region</b> |                        |                       |                             |                           |
|                              | <b>Physical Length</b> | <b>Genetic Length</b> | <b>Kb/cM per chromosome</b> | <b>Total No, of Genes</b> |
| <b>Chr1</b>                  | 19000000               | 38.09                 | 498.82                      | 1066                      |
| <b>Chr2</b>                  | 24400000               | 41.2525               | 591.48                      | 1338                      |
| <b>Chr3</b>                  | 18800000               | 5.084                 | 3697.88                     | 953                       |
| <b>Chr4</b>                  | 15500000               | 45.097                | 343.70                      | 712                       |
| <b>Chr5</b>                  | 16000000               | 2.209                 | 7243.10                     | 738                       |
| <b>Chr6</b>                  | 24400000               | 23.885                | 1021.56                     | 1290                      |
| <b>Chr7</b>                  | 14800000               | 8.95                  | 1653.63                     | 754                       |
| <b>Chr8</b>                  | 4400000                | 13.651                | 322.32                      | 243                       |
| <b>Total</b>                 |                        |                       |                             | 7094                      |
| <b>Average</b>               |                        |                       | 1921.560902                 |                           |
| <b>Percentage</b>            |                        |                       |                             | 31.54010315               |

| <b>Euchromatin</b> |                           |                        |                               |                     |
|--------------------|---------------------------|------------------------|-------------------------------|---------------------|
|                    | <b>Genetic Length(cM)</b> | <b>Physical Length</b> | <b>Kb/cM euchromatic arms</b> | <b>No, of genes</b> |
| <b>Chr1</b>        | 112.89                    | 23.04                  | 204.09                        | 2021                |
| <b>Chr2</b>        | 113.2775                  | 9.16                   | 80.88                         | 715                 |
| <b>Chr3</b>        | 85.956                    | 21.05                  | 244.86                        | 1732                |
| <b>Chr4</b>        | 89.043                    | 36.23                  | 406.92                        | 2806                |
| <b>Chr5</b>        | 112.251                   | 27.51                  | 245.08                        | 2206                |
| <b>Chr6</b>        | 101.755                   | 33.83                  | 332.49                        | 2547                |
| <b>Chr7</b>        | 170.87                    | 22.03                  | 128.94                        | 1739                |
| <b>Chr8</b>        | 82.559                    | 16.92                  | 204.97                        | 1632                |
| <b>Total</b>       |                           | 163.81                 |                               | 15398               |

|            |  |  |             |             |
|------------|--|--|-------------|-------------|
| Average    |  |  | 231.0279243 |             |
| Percentage |  |  |             | 68.45989685 |

**Table S13. Colinear genes (A) and blocks (B) between *C. reticulatum* and *Medicago truncatula* pseudomolecules.**

**A.**

|            | Lines  | Unique Lines | Mt1         | Mt2         | Mt3         | Mt4         | Mt5        | Mt6 | Mt7         | Mt8        |
|------------|--------|--------------|-------------|-------------|-------------|-------------|------------|-----|-------------|------------|
| <b>Cr1</b> | 2,615  | 2,004        | 137         | <b>1445</b> | 346         | 346         | 85         | 0   | 161         | 95         |
| <b>Cr2</b> | 1,267  | 1,058        | 12          | 35          | 72          | 121         | <b>612</b> | 277 | 82          | 56         |
| <b>Cr3</b> | 1,986  | 1,527        | 280         | 18          | 68          | 41          | 28         | 43  | <b>1287</b> | 221        |
| <b>Cr4</b> | 2,730  | 2,183        | <b>2037</b> | 28          | 148         | 30          | 139        | 14  | 315         | 19         |
| <b>Cr5</b> | 2,283  | 1,781        | 111         | 192         | <b>1475</b> | 183         | 156        | 11  | 33          | 122        |
| <b>Cr6</b> | 2,613  | 2,140        | 33          | 199         | 267         | <b>1190</b> | 134        | 90  | 62          | 638        |
| <b>Cr7</b> | 1,868  | 1,506        | 6           | 97          | 61          | 698         | 224        | 0   | 52          | <b>730</b> |
| <b>Cr8</b> | 1,792  | 1,358        | 198         | 137         | 40          | 434         | <b>643</b> | 172 | 0           | 168        |
|            | 17,154 | 13,557       | 2,814       | 2,151       | 2,477       | 3,043       | 2,021      | 607 | 1,992       | 2,049      |

**B.**

|            | Mt1       | Mt2 | Mt3       | Mt4       | Mt5 | Mt6 | Mt7       | Mt8       |     |
|------------|-----------|-----|-----------|-----------|-----|-----|-----------|-----------|-----|
| <b>Cr1</b> | 10        | 41  | 3         | 29        | 8   | 0   | 9         | 9         | 109 |
| <b>Cr2</b> | 1         | 3   | 9         | 7         | 43  | 20  | 7         | 5         | 95  |
| <b>Cr3</b> | 17        | 1   | 7         | 5         | 3   | 4   | <b>44</b> | 15        | 96  |
| <b>Cr4</b> | <b>82</b> | 3   | 14        | 2         | 6   | 2   | 21        | 2         | 132 |
| <b>Cr5</b> | 10        | 4   | <b>52</b> | 8         | 17  | 1   | 4         | 5         | 101 |
| <b>Cr6</b> | 5         | 21  | 16        | <b>61</b> | 12  | 5   | 8         | 22        | 150 |
| <b>Cr7</b> | 1         | 10  | 5         | 14        | 17  | 0   | 7         | <b>46</b> | 100 |
| <b>Cr8</b> | 12        | 8   | 5         | 9         | 10  | 11  | 0         | 11        | 66  |
|            | 138       | 91  | 111       | 135       | 116 | 43  | 100       | 115       | 849 |

**Table S14. List of resistance gene homologues predicted in *C. reticulatum* genome assemblies (submitted as an excel file).**

**Table S15. Colinear RGHs between *M. truncatula* and *C. reticulatum* genome assemblies (submitted as an excel file).**

**Table S16. Sequence diversity between *C. reticulatum* and *C. arietinum* ICC4958 and CDC Frontier**

**A. *C. reticulatum* reads mapped on *C. arietinum* ICC4958 pseudomolecules**

|         |                     | Raw              | Raw             | HQ<br>(Q $\geq$ 30) | Raw              | HQ(Q $\geq$ 30)  |
|---------|---------------------|------------------|-----------------|---------------------|------------------|------------------|
| LGs     | LG Size             | SNPs + InDels    | InDels          | InDels              | SNPs             | SNPs             |
| Ca_LG_1 | 3,99,01,017         | 8,52,420         | 58,833          | 42,414              | 7,93,587         | 2,13,381         |
| Ca_LG_2 | 3,32,33,457         | 7,57,453         | 45,903          | 31,581              | 7,11,550         | 1,70,028         |
| Ca_LG_3 | 4,22,67,542         | 9,22,325         | 59,883          | 42,568              | 8,62,442         | 2,11,478         |
| Ca_LG_4 | 5,49,92,815         | 11,48,304        | 80,246          | 59,509              | 10,68,058        | 2,98,242         |
| Ca_LG_5 | 4,58,19,701         | 9,61,555         | 63,892          | 45,826              | 8,97,663         | 2,24,449         |
| Ca_LG_6 | 5,48,41,389         | 11,44,356        | 74,406          | 54,184              | 10,69,950        | 2,64,837         |
| Ca_LG_7 | 4,52,79,478         | 8,67,825         | 53,492          | 37,705              | 8,14,333         | 1,74,065         |
| Ca_LG_8 | 1,76,64,089         | 3,36,952         | 24,745          | 16,068              | 3,12,207         | 78,637           |
|         | <b>33,39,99,488</b> | <b>69,91,190</b> | <b>4,61,400</b> | <b>3,29,855</b>     | <b>65,29,790</b> | <b>16,35,117</b> |

**B. Number of *C. arietinum* ICC4958 genes carrying SNPs and InDels with respect to *C. reticulatum***

| No. of SNPs | No. of genes | No. of InDels | No. of genes |
|-------------|--------------|---------------|--------------|
| $\geq 300$  | 4            | $\geq 50$     | 2            |
| $\geq 200$  | 11           | $\geq 40$     | 6            |
| $\geq 150$  | 36           | $\geq 30$     | 16           |
| $\geq 100$  | 160          | $\geq 20$     | 90           |
| $\geq 50$   | 1142         | $\geq 10$     | 927          |
| $\geq 5$    | 13179        | $\geq 5$      | 4131         |
| $\geq 1$    | 18048        | $\geq 1$      | 13580        |
| 0           | 5567         | 0             | 10035        |

**C. *C. reticulatum* reads mapped on *C. arietinum* CDC Frontier pseudomolecules**

|       |             | Raw           | Raw    | HQ (Q $\geq$ 30) | Raw      | HQ( $\geq$ 30) |
|-------|-------------|---------------|--------|------------------|----------|----------------|
| LGs   | LG Size     | SNPs + InDels | InDels | InDels           | SNPs     | SNPs           |
| Ca_LG | 4,83,59,943 | 7,98,210      | 80,591 | 47,977           | 7,17,619 | 2,24,468       |

|            |                         |                  |                 |                 |                      |                      |
|------------|-------------------------|------------------|-----------------|-----------------|----------------------|----------------------|
| 1          |                         |                  |                 |                 |                      |                      |
| Ca_LG<br>2 | 3,66,34,854             | 6,58,928         | 63,123          | 34,728          | 5,95,805             | 1,77,782             |
| Ca_LG<br>3 | 3,99,89,001             | 7,06,626         | 73,257          | 42,858          | 6,33,369             | 1,98,082             |
| Ca_LG<br>4 | 4,91,91,682             | 8,61,229         | 95,247          | 61,404          | 7,65,982             | 2,88,742             |
| Ca_LG<br>5 | 4,81,69,137             | 7,93,622         | 81,967          | 48,510          | 7,11,655             | 2,22,091             |
| Ca_LG<br>6 | 5,94,63,898             | 9,57,176         | 98,797          | 60,719          | 8,58,379             | 2,78,679             |
| Ca_LG<br>7 | 4,89,61,560             | 7,27,540         | 68,510          | 38,478          | 6,59,030             | 1,76,207             |
| Ca_LG<br>8 | 1,64,77,302             | 2,42,401         | 28,913          | 13,810          | 2,13,488             | 73,198               |
|            | <b>34,72,47,37</b><br>7 | <b>57,45,732</b> | <b>5,90,405</b> | <b>3,48,484</b> | <b>51,55,32</b><br>7 | <b>16,39,24</b><br>9 |

**D.** Number of *C. arietinum* CDC Frontier genes carrying SNPs and InDels with respect to *C. reticulatum*

| No. of SNPs | No. of genes | No. of InDels | No. of genes |
|-------------|--------------|---------------|--------------|
| ≥ 300       | 8            | ≥ 50          | 13           |
| ≥ 200       | 30           | ≥ 40          | 26           |
| ≥ 150       | 63           | ≥ 30          | 54           |
| ≥ 100       | 176          | ≥ 20          | 161          |
| ≥ 50        | 959          | ≥ 10          | 1004         |
| ≥ 5         | 13419        | ≥ 5           | 3710         |
| ≥ 1         | 19022        | ≥ 1           | 12610        |
| 0           | 3961         | 0             | 10373        |

**Table S17.** Average nucleotide diversities of the wild, and domesticated chickpeas along the linkage groups.

| Linkage Groups | $\theta\pi$ |            |
|----------------|-------------|------------|
|                | Wild        | Cultivated |
| Cr_LG_1        | 0.347       | 0.313      |
| Cr_LG_2        | 0.319       | 0.298      |
| Cr_LG_3        | 0.324       | 0.265      |
| Cr_LG_4        | 0.389       | 0.320      |
| Cr_LG_5        | 0.313       | 0.268      |
| Cr_LG_6        | 0.315       | 0.304      |
| Cr_LG_7        | 0.348       | 0.302      |
| Cr_LG_8        | 0.293       | 0.293      |

**Table S18. Flanking sequences of identified SNPs for wild and cultivated mapped on reticulatum for generating markers for large-scale genotyping (submitted as an excel file).**

**Table S19. Accessions used for diversity and population genetic structure analysis (submitted as an excel file).**

**Draft genome sequence of *Cicer reticulatum* L., the wild progenitor of chickpea provides a resource for agronomic trait improvement**

**SUPPORTING TEXT**



**Text S1.** CDS and Protein sequences of 4 RGH obtained by mapping the identified RGF in the advanced draft genome of chickpea ICC4958, onto the *C. reticulatum* genome.

>Cr\_26581.1|Cr\_LG\_2:2743436-2751375|plus|

ATGGAATACCTTTATGGATTTGCGTCTTCTATTTCAAGAGATTTGGTGTGCGGGCGTGATAGGT  
CAGTTAAGTTATCCCTGCTGCTTCAACAATTTTGTTC AAGACCTTGCAAAAGAAGAAGGTAAT  
TTGGCTGCAACAAGAGCTAGTGTCCAAGACCGTGTTACACGAGCCAAGAAGCAAAGCTAGAAA  
CACTGCTGAGGTTGTTGATAAGTGGTTGAAGGATGCTAACATTGTCATGGACAATGTTGATCA  
GTTACTACAAATGGCAAAAACAGAAAAGAACTCTTGTCTCGGGAAGTGTCCAAATTGGATTT  
GGCGATACCGTGTAGGCAGGAAGTTAGCAAAGAAAAAAGGGACCTTACATTGTGCATTA  
AAAGGTAGACAATATATACAGATTGAACACCCTGCTGCACTTCAAGCAATTTTTCTTCTGAT  
AAATGTTGGGAGTTTGATAGTAGAAAACCTGCATATGAGGAACTTATGTGTGCTTTGGAAGA  
TGATGAGGTTATTATGATTGGATTGTATGGGATGGGGGTTGTGGTAAAACAATGCTTGCAA  
AAGAAGTAGGCAAGAGAGCTGGCCATCTTTTTGATCAAGTGCTTTTTGTTCTATATCTAGTA  
CTGTAGAAGTGGAAAGGATCCAAGAAAAAATTGCAGGCTCTCTGAATTTGAATCCAAGAA  
AAAGACGAGATGGACAGATCACAACGCTTATGCATGAGGTTATCACAAGAAGAAAGGGTTCT  
TGTGATTCTGGATGATGTGTGGCAAATGCTAGATTTTGATGCCATAGGGATTCCTTCTAGTGA  
GCATCATAAAGGTTGCAAAGTTCTCATTACCAGTAGATCAGAAGCAGTTTGTACTTTGATGGA  
TTGCCAGAAAAAATTCACCTGTCAACATTAACCAACGATGAAACGTGGGATCTTTCCAAA  
AGCAAGCACTCATATCTGAAGGCACTTGGATTACTGTAAAGAATTTGGCTAAAGAAATTTCA  
AATGAATGTAAAGGCTTGCCGTGCGCCATTGTAGCAGTGGCTAGCAGCTTAAAAGGCAAGGC  
GGAGGTAGAATGGAAGGTTGCATTGGATAGATTGAGAAGTTCGAAACCTGTTAATATTGAAA  
AAGGTTTGCAAACCCGTACAAGTGCTTGCAGTTAAGCTATGATAATTTGGACACCGAAGAG  
GCCAAGTCACTTTTCTTGTGTTCTGTGTTTCTGAAAGATTGTGAAATTCCTGTTGAGCTTT  
TAACTAGGTCTGCAATAGGGCTAGGCATTGTTGGAGAAGTTCGCTCATATGAAGGGGCAAGG  
GATGAAGTGAGTGCGGCTAAAAATAAGCTCATAAGTTCTTGTGTTGCTGGATGTTGATGAA  
GGAAAATGTGTCAAAATGCATGACTTAGTTTCGCAATGTAGCCATTGGATTGCGGAGAAGGC  
GATTAAGTGTACCTCAGAAAAGGATATGACTTTGGAACATACTTCATTAAGATATCTATGGTG  
TGAGAAATTTCCAAATAGTTTGGATTGTTCCAATCTTGACTTTCTACACATTCACACATATA  
CAAGTATCAGATGAAATTTTCAAAGGAATGAGAATGCTCAGAGTTTGTCTTTACAACAAG  
GGTCGGGAGAGAAGGCCATTGTTGATTACATCATAAAATTATTGATGAATCTTCGTTGCATA  
GTCCTGAGTAAATGGGATTTAGTTGACATCTTATTTGTGGGAGACATGAAGAACTTGAAAGT  
CTTACATTGTGTGATTGTTTCATTCCTTGAATTACCTGATGTGATTACACAAGTACAACTTGA  
GATTGTTGGATTTGTCAGAATGTGACATGAAAATGAATCCGTTTGAAGTAATTGGGAAACAC  
ACACAGCTAGAAGAACTGACTTTGCTGATCGTAGATCGAAATGGGAAGTGAATTCTTAAA  
AAAGTTTAGTGTCCCACAAGTGTACAGAGGTATCAAATACAGTTAGGAAGTATGTTTGCCG  
GTTTCCAACAAGAGTTTCTCAATCATCGCAGAAGTGTGTTTCTCAGTTATTTGGATACATCTAA

TGCTGCGATTAAGGATTTGGCCAAAAAAGCAGACGTCTTGTGTGTAGCATGTATCGAGGGAG  
GTGCTAAAAATATTATCCCTGACATATTTCAAATAGAAGGAGGAAGTATGAATCATTAACTG  
AGCTTTTGATACGCGATTCTAAGGGGATAGAGTGTGGTTGACACTTGTCTGATAAACGTAG  
GAACTCTCTTCTGCAAGTTGCATTGGCTAAGAATTGAGCACATGGAGCGTTGGGAGCTTTAT  
ACAATGGTTCGAAGAATGCCTCTTGGTGGTCATTTGAGAATTTAGAAGACCTATATATAAGTA  
ATTGTCCAAAGCTAACATGTCTCTTACACTTGCAAGTTGCTCAAAAATCTGGCACAATTGGAGA  
AGTTAGAAGTATTATCTTGCCTGCACTGAAACATATACTAATNNNNNNNNNNNNNNNNNNNN  
NNNNNNNNGGAGATAAGTGCATATGATCACAGACTTCTGTTTCCAAAATTAATAAGCTTCA  
TGTTAGAGAGTGTGGTATGCTGGAATACATAATCCCAATCACTTTAGCTCAAGGCCTTGTACA  
ATTGGAGAGTATAGAAATCGTATGTAATCATAAGTTGAACTACATATTTGGCCAAAGTACAC  
ACAAAGATGGTCAGAATCAAATGAACTCAAGATCGAGCTTTTGGCCCTGCAAGAGCTTACT  
CTTGTCTCTTGGCCAAATATCAATAGCATTGTCTAGAAGATTGTTATCTAATGTGGCCATCCT  
TGTGTCAATTCAATTTGCAAAAATTGTGGAGAGTTTTTCATGGTGTCTATCAATACTTGCATGGC  
TTTACACAACAATCAGATAATCAACGAAGCTTCACGTCAAATTGTGCAAAAATATAAAGAAG  
TTCGAGTCAATAACTGTGAGTTAGAAGGCATCTTTCAGCTAGCAGGACTATCCATTGATGGAG  
AAAAAATCCACTGACATCATGTTTGGAAATGTTGATTTGGAGAATCTACCTCAGCTCAGAA  
GGTTAAAATTTATCTTCTCATCCTGTATGGCAGGAGGGTTACCTCAGTTGAAAGCGCTAAAGA  
TAGAAAAGTGAATCAGCTAGATCAAATCGTTGAGGATATTGGCACTGAAATCCCTTAGGA  
TCATTTGGTTTTCCAGCCTTATAAGGTTAACACTAATATCATGTCCGATGCTGGGTTTCATTGT  
TTACAGCATCTACTGCTAAAACCTTGACTTCACTGGAAGAATTGACAATACATGATTGCCATG  
GTTTAAAGCAATTACTGACTTATGGAAGAGCTCAGAAAAATACAAGGGGAGAAATAGATCAG  
GATGATCAGGACTTTCAGAGTTGTACGACAATGTTCCAAAGTTTGAAAAAGATTAGTATTTG  
AGATGTCATTTGCTGAAGTATATATTACCCGTTTCATTTGCGAGAGGACTGGTGAAATTGGAA  
GCTATAGAAATCACAGAGACTCCCGAGCTGAGATATGTATTTGGTCAAAACAGTCATGCTTCC  
CATCAATATCTAAACAAGTTCCAAATTGAGCTTCTGTTTTGGAAAAAGTTGCACTCTATGAT  
ATACCAAATATGATTGCCATTTATCCAGAAAATCATGCAACATGCTCATCTTGGCAACTT  
CTTGTGATGAACGATGTTGGTCTATCAATGAATAATTTGATGGTTGATTTTGGAGCCACAGAC  
TCAGATCTTAGTTCTAAAACAGATGAATGGGAAACAAGTATGAGTATTGAGAAGAAGTTAGT  
ATCTGTTATTATTGAGAATGGATCCAAAATTGAAGGCGTTTTTCAAATGAATGGATTCCCAAT  
CAATGGACAACAAGTGGTGTCTGGTTAGAAGACCTTAAATTGGTCAATTTGGCAGAGCTAA  
TGTACATATGGATGGGTGCTAAACATTTTGCAAGCCTTCAGCATCTTCAGAAAATACACATCT  
GCAATTGTCCAAAACCTGAAGTCTATCTTCTCCATCTCTGTCTTGAGAGTCCTACCCCTGTTGAA  
GATTCTTGTGGTAGAACAGTGTGAGGAATTAGAGCAAATCATTGAAGATGATGAAGAAAATG  
AAAATGTCCCGAATTCTAAAGTGTGCTTCTCACAGCTAAAGTTTCTTCTTGTACACACTGCA  
ACAAATTGAAGCATTGTTTTATATCCCCACATCCCATGAGTTTCCAGAACTGGAGTATCTGT  
CTCTCAATCAAAAATTCTAGTCTAGTTCAAGTGTAAAGTTGGTCTGGTGTGAGAGAAGGTA  
GAATGGAAGCTTTGCTTCCAAAACCTCAAACATATAATGCTAATGCAACTGCCAAACCTCAAT  
AATATGTGTCAAGGGGTTGAGTTTCACTCTGACCAATCTTTTGGTGCACAATTGCCAAAAA

ATCTCACTAACTTCAGCGACTACTGTTGAGGACATGCTAAAAATCTATCATCATGACAAGGAA  
TTTGGTTTCTATCTCTGTCCACACTTACACGACATAAGTTGTACAACAACAAATGGCCAAGAG  
TTCATTACATCAAAGAACAAAAACAAAGGGATACAAGATTTACAATCACAGGAGCAGAACT  
GTCATCCATTCTTTACCAAACCTTGACAGAGAACTGGTTGAAATGCCATTTCTAGTCATTTTG  
CCACACAAGGAAGTTGTGGAGGAGTTGGTTAAAGGACAATCCACGGATGAACCATGTTTGAT  
GAGCCAACAAAATCCACTTGAAGAATCTAGAGTTACGATGATTACTGAAGAGGGAACCTTCAT  
CAAAGAATGTGGAGATGGTAGCTTCGCCAATTCATTCCGATTCTGATAGCTCAAAGTCAGACC  
CATTAGTTACATCTCAACGTAGACCACATCCACATTGTGAAATAAGCTTCAGCCAACTGAGA  
CTTACACTAATGAAGAAAACAAAGACCATCCTATAAATACAGTAGACTTGGGGGCCAGTGAT  
CTCATCAGTTTATTTCAACCCGTCGAAGAAGATGATGAAGGCCAAATAACCACACCTTGTGTT  
TCTGAAGTGACTGAACAACATCATTCAACCAAAGATAACTTAGTTGCGAAGGCACTTTCTGAC  
CTGGAAGAGTGTTTGAAAATGCCTCTGAAGGACATAGCTAGCTCTGAGGCTAACAGCCTTCG  
CCTTCTAACAGCTCTTAACTTCTTGTCCACCTTTCTTTAAAAGATGCAGCTGTATCAGATGGA  
CTCCAAGCTATAATAGACACTATGCACAGAGAATTCCCAAGCATCCTATGCTCCTTCAAACAA  
GGATTTACCCTAGACAAATTTGTTGTGATTGAAGCTCATCATGATGAGGCAGCCATTACTCTT  
GCTTCCAAAATTTCAAAGCAGATAGTTTTTTGGATGAAGCTCAACAGAGGGAAGCAACTTT  
GAAGGAACATATCATTCAATTGAAGAAAGAAATAAAAAATCTTGAGGCTGAACTATCTTATC  
TTGATGAGAAAAAGGACAAATGCATTCAAGAACTATAGGGTACAGAATGGAGTTGGAGAA  
TGTGAGGAAAGACAAGTATCAAATTGTGGAAGATCAGATGAAAGCTCGGCAAGAAATATTTG  
AAGTCGATTATAAATGGTCTGCTTTAAGTAGTCAGTTTCGGTACAACACTACATTGTTGAAAGAA  
ATCCTTCTTGA

>Cr\_25681.1|Cr\_LG\_2:2743436-2751375|plus|

MEYLYGFASSISRDLVCGVIGQLSYPCCFNNFVQDLAKEEGNLAATRASVQDRVTRAKKQTRNT  
AEVVDKWLKDANIVMDNVDQLLQMAKTEKNSCLGNCPNWIWRYRVGRKLAKKKRDLTLCIKE  
GRQYIQIEHPAALSSNFSSDKCWEFDSRKPAYEELMCALEDDDEVIMIGLYGMGGCGKTM LAKEV  
GKRAGHLFDQVLFVPISSSTVEVERIQEKIAGSLEFEFQEKDEMDRSQRLCMRLSQEERVLVILDDV  
WQMLDFDAIGIPSEHHKGCKVLITSRSEAVCTLMDCQKKIHLSTLTNDETWDLFQKQALISEGT  
WITVKNLAKEISNECKGLPVAIVAVASSLKGAEEVWKVALDRLRSSKPVNIEKGLQNPYKCLQL  
SYDNLDTEEAKSLFLLCSVFPEDCEIPVELLTRSAIGLGIVGEVRSYEGARDEVSAAKNKLISCLLL  
DVDEGKCVKMHDLVRNVAHWIAEKAIKCTSEKDMTLEHTSLRYLWCEKFPNSLDCSNLDFLHH  
TYTQVSDEIFKGMRLRVFLFLYNKGRERRPLLITSLKLLMNLRCIVLSKWDLVDILFVGDMMKLE  
SLTLCDCSFLELPDVITQLTNLRLLDLSECDMKMNPFEVIGKHTQLEELYFADRRSKWELEFLKFF  
SVPQVLQRYQIQIGSMFAGFQQEFLNHRRTFLSYLDTSNAAIKDLAKKADVLCVACIEGGAKNII  
PDFIQIEGSMNHLTELLIRDSKGIECLVDTCCLINVGTLFCKLHWLRIEHMERLGALYNGRRMPLG  
GHFENLEDLYISNCPKLTCLFTLAVAQNLAQLEKLEVLSPALKHILXXXXXXXXXXEISAYDHR  
LLFPKLLKLVRECGMLEYIIPITLAQGLVQLESIEIVCNHKLNYIFGQSTHKDQGNQNELKIELLA

LQELTLVLLPNINSICLED CYLMWPSLCQFNLQNCGEFFMVSINTCMALHNNQIINEASRQIVQNIK  
EVRVNNCELEGIFQLAGLSIDGKNPLTSCLEMLYLENLPQLRRLKFIFSSCMAGGLPQLKALKIEK  
CNQLDQIVEDIGTEIPLGSFGFPSLIRLTLISCPMLGSLFTASTAKTLTSLEELTIHDCHGLKQLLYG  
RAQKNTRGEIDQDDQDFQSCTTMFQSLKKISILRCHLLKYILPVSFARGLVKLEAIEITETPELRYVF  
GQNSHASHQYLNKFQIELPVLEKVALYDIPNMIAYPENYHATCSSWQLLVMNDVGLSMNNLMV  
DFGATDSLSSKTDEWETSMSIEKKLVSVIIENGSKIEGVFQMNGFPINGQQVVSWLEDLKLVNLA  
ELMYIWMGAKHFASLQHLQKIHICNCPKLSIFSISVLRVLP LLKILVVEQCEELEQIIEDDEENENV  
PNSKVCFSQLKFLLVTHCNK LKHLFYIPTSHEFPELEYLSLNQNSLVQVFKVGPVREGRMEALL  
PKLKHIMLMQLPNLNNMCQGVFHTLTNLLVHNC PKISLTSATTVEDMLKIYHHDKEFGFYLCPH  
LHDISCTTTNGQEFITSKNKNKGIQDLQSQEQLSSIPLPNLTENWLKCHFLVILPHKEVVEELVKG  
QSTDEPCLMSQQNPLEESRVTMITEEGTSSKNVEMVASPIHSDSDSSKSDPLVTSQRRPHPHCEISF  
SQTETYTNEENKDHPI NTVDLGASDLISLFQVVEEDDEGQITTPCVSEVTEQHHSTKDNLVAKALS  
DLEECLKMPLKDIASSEANSLRLLTALNFLSHLSLKDAAVSDGLQAIIDTMHREFPSILCSFKQGFT  
LDKFVVIEAHHDEAAITLASKISKADSFLEAQQREATLKEHIIQLKKEIKNLEAELSYLDEKKDKC  
IQETIGYRMELENVRKDKYQIVEDQMKARQEIFEVDYKWSALSSQFRYNYIVERNPS

>Cr\_25682.1|Cr\_LG\_7:17612745-17618450|minus|

ATGAGTGTGCAATCTAGCTTCACCTACGATGTGTATCTGAGCTTCAGAGGTGAAGATACACGA  
TTCGGTTTTACTTCAAATCTCTTCGCTGCTCTTAAACAAAGAAGTATCCATACATTTACTGACG  
ATGCGCTGCTTCTTAAAGAAGAGAATATATCTCAATCACTTTTTAGGGCAATCGAAGAGTCTA  
GGATCTTCATCATTATATTCTCCCCAACTATGCCTCTTCTAAGTGGTGTGGGAAGAACTAAC  
CACGATCCTAGAGTACTATGAAGAGGGGAAGAAGAAAAATTGGGGAAAAGTTTTACCAATTT  
TCTATGACGTTGATCCTTCTGATGTGCGAAACGGGAGAGGAAGTTATGGAGAAGCACTGGAT  
AAACATGAAGAGATGTTCAAGGATGACCTTGAGAAGGTGACAAATGGAGGAGGAGAGATG  
GAAACGAATATAAATTTATCGAGAGTATTGTAAAGGAAGTCTTTCGCATGATTTCTCGCGTTT  
CTTCTTTACATGTTGCTGGTTACCCTGTTGGATTGGAGTCTCGAGTGGATAAAGTAAACTCAC  
TTCTGAATCTTGGGTCTGATGATTTAGTTCAAATGGTAGGGATATGGGGAATTGGTGGAATAG  
GGAAGACCACAATTGCTCGAGCCGTATGTAATTCAATCAGTCACTTGTTTGAAGGTTTATGTT  
TTCTCAATGATGTGAGACAGAATTCAATGAAGTATGGCTTGGTACATCTCCAAGAGACTGTTT  
TTTCTGAGATATGTGGAGATGTAATAAAAATAAAGAGTGTCAACCAAGGAATCCAATAATA  
AAGCAGAAACTCCACCGGAAAAAGGTTCTTTTAGTTCTTGACGACGTTGACAATTTGAAGCA  
ACTCCAGGTTATTGCAGGAGCATCTGATTGGTTTGGTCCTGGAAGCAGAATCATCGTTACAAC  
TCGGGACAAGCATTTTCTAGTAAGTCATGCGATTGAAAGAATATATGAAGCAGACGCATTAA  
GTGAAAAAGAATCTCTTGATTTGCTTAGTTGGAATGCTTTTAAAACCGACAAAGTTGATCCAT  
GTTTTGTAGACATTTTAAAACGTGCATTGACTTTTGTCTGGGCTTCCATTGGCTTTGCAAGT

AGTAGGCTCCTACTTGTTTGGCAGAAGTATAAATCAGTGGATAAGTGCATTGGATCATTATGA  
AAGAGTTCCTCGATAAACATATCCAAACAGTACTCAAGATAAGCTACGATTCCCTTAGAGGAAG  
AAGAGAAGAGTGTTTTTCTTGATATTGCTTGTTTCTTCAATGGACATAAGTTAGAAGACGTCA  
AAGATATACTTTTGGCTCGTTATGGTGTATCTGCAAAATATAGTATTGAAGAATTGATTGAAA  
AATCTCTCATAAAGATCGATGATGGTCTTGTGACATTACATAACTTGATTCAAGACATGGGTA  
GAGAAATTGTCCGACAGGAATCACCATATGAGCCTGGCAAACGCAGTAGGTTATGGCTTCT  
AAAGATGTAGTTTGCCTTTTAGAAAAAACTCGGGTTCTAGTACAATTGAAAGCTTATTTTTG  
GATTTCCCAAAGATGAAGTGAATTCACATGGACCCAAAGGCCCCACACATCTTCCAATAG  
TTTAAAAGTGTTGAAATGGCGAGGGTATCCTTCAGCGTCATTACCAAATGATTTTCATCCGAA  
GAAGCTTGCCATACTCGAGTTACCTGCAAGTTGCGTAGTGACGTTTAGAAGCCTGAAATATAT  
GAATTTAACTACTGTGAACTGATAACTCATATACCTGATGTATCTGGCCTCCCAAATTTAGA  
AACATTGTCATTTAGAGATTGTGTGAATTTATCTGAAATTCATGTGTCAGTTGGATTCTGGAT  
AACTTAAAATCTTGGATGCTGGTCATTGCAAGAACTTATGGCTTTTCCACCCATCAGATTG  
ATCTCTCTGAACAATTCTATATTTACATTGCTCAACTCTAGAAAGTTTCCAGAAATATTGG  
GGAAGATGGAAAATTTAACAGAGCTTCGAATCATCGGAAGTCCTATACAAGAATTGCCATTT  
TCAATTCAAAACCTAAATCGGCTTCGAAAATTAGAACTACAAATCTGTGGAACGGTTCAGTTG  
CCAAGTAGCATTGCCATGTTTTCACAACTTGGTTTTGATGTGTGTTTTCGAGATGCGAAGGGTTA  
TGTTTAAACAAAACAGGACATAGGTGAAGAATGGGATACCAAGTCTTCAAAGACAGAACGTCT  
TATTCTGTCTACTGCAATATATCAGATGACTTCCTTCCAATAGGTCTTACTTTGTTTGCCAA  
GTAAAGGATTTGGACCTGTCGGGGAATCATTTCACTATTCTTCACGCGTGCATTAAGGAATGT  
CACTTTCTGAGGAACCTTAAGCTGAATGATTGCGTGCTTATACGAGAAATTACAGTGATGCCA  
TGTAATTAGAAACACTTTCTGCAAAACGATGCAAAATCCTTCAAATACATGGATCTTACAGG  
AGAATGTCACTCTTTGAGAGAACTTACTCTGGATGATTGTATTTATCTTCGAGAAATTAAGG  
GGTTCTGTCAAACCTTGGATCATTCTCTGCAAAAACTGCACATTATTGACTTCCCAATGTGC  
AAGCATGTTAGTGAATCAGGAAATGATCGAAGCTGGAAACAAGATGTTTTCTTTGCCAGGAT  
CAAATATCCGGATTGGTTTGCACCGTACAAGTGGAGAGTCAATATCTTTCTGGTTTCGTA  
ACAAATCCCTGCAATTTCTCTGTGTCTTGTTATTGGACAGGAAGATGAGCTACCTATCTCAG  
TCAAGTTTAGTCCAAAAGTGCTCATCAATGGCAATGAACTGTCCGGTGGCAATCAGAAAGTC  
TACAAGTTCAGGATAGCTACGGATCATATACTTTGTTTGATGCACGGATGCTAAGTTTTGAA  
GATAATGGAGATACAGAATTGTCAGACTATGAGTGGAAACCATGTGGTGGTTTTCATATGAGGA  
TCTTATTACTGACAACGGGGTTCCAATCAGAGTGGTTGCCAAATATAGCGGAATCCATGTATT  
TAAACAAACGAGTGGACTGGAGGATATCCAATTCACCAATCCCCGAAAACATTTATAAATG  
CGAATTTGGGTCCCAATCAATGGCAGAGCCACCTCAAAGAGAACTTCAGAGAGTCTTTCA  
ATAATGAAGTTTATGCTACTTTAAAAGAAAATGACCCTCCTGTCATTACGGATGTAGTGTG  
GACGAGGATGCCGATCTGGATGCAGTATCCTGTGAGGAAGAGTCTTCTTCCAACACTGAAGG  
TTCTGATTCAGATGATCCCTTCGACTTGATTAATAGAAAATCTGTGTTAGTTGGAAGAAAAT  
CATATCCTCAGGATCAAGTTCTGGAGATGCAAAATCTAAGATCCATTAGCGAGGCTATTAATGC  
CTTGGAGTTGTTAATGGTGAAGGACTTATCAGAAGTCTTCTGATCCCGCAGCGCATTCCAA

ACTTCATCAGCTCTTGGATCTATTGGGTGCAAGTAGCCACCCCAAGGTGACTGTAGAGATGAA  
GGAGGCTATTGTGGAGTTCAAGAGAAAGGCCTTTTTATTATTCCAACAATTCCAATCCACTGT  
TGAGTCTGTCAAAACACTGAAGGATTTTGAGAAGCATCTGACCAGAATTAAGCAAGAGACTG  
TGGAAGGCAAGAGTCGAAGAAAGGACCTAAAAAACTCAATAAAAAGGGTTTCTTTGGGCATC  
AAAGCCGAAAATAGTAGTAAAAAGGAGCTAGAGTCAGAAATTGCAGTTTTAAGAAAACAAC  
TAGCTACCAAAGAAAGGGACCTTGAACAATTTGTGGTGAATCTCAAGAATCAGGAGGAAACA  
CTCTCGACCTATTCAACAAGTTATGCTTCTCTCAACGAGCAAGCTCAATCACTATTAACAACA  
GCTGATGATCTACTTGTCTGTAAGCAGTGGGATAAAGGATGAGGGTGAAGCAGCTGAAGTAGA  
GCAGAGTAGGCTCAGGTGGACTTGGTCTATTGATCTTACTGGCCAGCTTAATCAGATGAAAA  
AAAACATTCTTGGCTTCTAA

>Cr\_25682.1|Cr\_LG\_7:17612745-17618450|minus|

MSVQSSFTYDVYLSFRGEDTRFGFTSNLFAALKQRSIHFTDDALLLKEENISQSLFRAIEESRIFIIF  
SPNYASSKWCLEELTTILEYYEYGKKNWVKVLPFYDVPDSDVRNNGRGSYGEALDKHEEMFKD  
DLEKVDKWRRRDGNKYKFIKIVKEVFRMISRVSSLHVAGYPVGLSRVDKVNLSLLNLGSDDLVQ  
MVGIWGIGGIGKTTIARAVCNISISHLFEGLCFLNDVRQNSMKYGLVHLQETVLSEICGDVNKIKSV  
NQGIPIIKQKLHRKKVLLVLDDVDNLKQLQVIAGASDWFGPGSRIIVTTRDKHFLVSHAIRIYEAD  
ALSEKESLDLLSWNAFKTDKVDPCFVDILKRALTFASGLPLALQVVGSYLFGRSINQWISALDHYE  
RVPDKHIQTVLKISYDSLEEEEEKSVFLDIACFFNGHKLEDVKDILLARYGVSAKYSIEELIEKSLIKI  
DDGLVTLHNLIQDMGREIVRQESPYEPGKRSLWLPKDVVCVLEKNSGSSTIESLFLDFPKDEVNS  
HGPKGPTHLPNSLKVLRGYPASLPNDFHPKLAILELPASCVVTFRSLKYMNLNYCELITHIP  
DVSGLPNLETLSFRDCVNLSEIHVSVGFLLDKLKDAGHCKKLMAFPPIRLISLEQFYISHCSTLESF  
PEILGKMENLTELRIIGSPIQELPFSIQNLNRLRKLLELQICGTVQLPSSIAMFSQLGLMCVSRCEGLW  
LTKQDIGEEWDTKSSKTERLILSYCNISDDFLPIGLTLFANVKDLDLSGNHFTILHACIKECHFLRNL  
KLNDCVLIREITVMPCKLETLSAKRCKSLKYMDLTGECHSLRELTLDDCIYLREIKGVLSNLDHFS  
AKNCTLLTSQCASMLVNQEMIEAGNKMFSPLGNSNIPDWFARTSGESISFWFRNKFPALSLCLVIG  
QEDELPIVKFSPKVLINGNELSGGNQKVYKFRIATDHILLFDARMLSFEDNGDTELSDYEWNHVV  
VSYEDLITDNGVPIRVVAKYSGIHVFKQTSGLEDIQFTNPRKTFINANLGPNSMAEPPQRETSESLS  
NNEVYATLKENDPPVIHGCSVDEADLDAVSCHEESSNTEGSDSDDPFDLNRKLCVSWKKIIS  
GSSSGDANLRSISEAINALELLMVKDLSEVSSDPAHSLKHQLLDLLGASSHPKVTVEMKEAIVEF  
KRKAFLFQQFQSTVESVKTLDKDFEKHLTRIKQETVEGKSRRKDLKNSIKRVSLGIKAENSSKKEL  
ESEIAVLRKQLATKERDLEQFVNLKNQEETLSTYSTSYASLNEQAQSLKQADDLLAVSSGIKDE  
GEAAEVEQSRLRWTWSIDLGTQLNQMKKNILGF

>Cr\_25683.1|Cr\_LG\_8:207661-213091|minus|

ATGGATCTATTGAGTGGAGGTGCTGTTGGAGCTGTGATGGGAGAGATTGTAAAACATGATAT  
TCAAACAATCAAAAAGGGTCGAGACTTTGGTCCAACACTTGAAATGAACATAGAACTTTGA  
ACACTTTAGCACCTTTAGTAGAAGAAATGAAAAGGTACAGTGATTTATTGGATCGACCCAGA  
GATGAAATAGAGAGGTTAGAGAAACACATAAGAGAGGGTCAAGAGCTTGTAACAAAAAGCA  
AGAACTTAATCGATGGAAGTTTCCTTCTTTCCACGTTACCAATCAAAGCTTCAGAAGAAAG  
ATGAGGCTCTTCAGAGACATTTGTCTGTTAATGTTCAAGGTTTGATTGGTGCTCCTGAAGAGC  
TTGAATGTTTGGGAATGGTTGAGCCGTTAAATAAGTTGAAGATTGAATTGCTTAAGGATGGTG  
TTTCTGTACTTGTTTTACTAGTTTGGGTGGTTCAGGTAAAAGCACACTTGCTAAGAAGATTT  
GTTGGGATCCACAAATCAAAGGAAAGTTTGATGGAAACATCTTCTATGTTACCGTCTCAAAA  
ACTCCCAATTTGAACAACATTGTAAAAACACTATTTGAACACTGTGGAAGTCAGGTGCCTGA  
GTTTCAAAGCGATGAAGACGCAATTAAGCAACTGAGACATCTTCTGAGGAAGGAGGATCTCA  
AAGGGAAAAAATTTGTTGAGGAAGAATCTCAGTCTGAAGAAGATGAACACCTTTGTGAAATT  
GACGAGGAGGAAGATCGCAATCAAGTTTGGCCTGAGAAAGATGGGAATCATGGTAAAGTTC  
GGCTACATGAAGATGAACTGCTAGCTAAATTTGAGCAGGATGAAAATCAACGTCGTGCGAAA  
GATCAACTTGAGGAAGATGAGCAACTTGCAAGGACAATTCAAGAAAGTTTGAACATTGGTTC  
TCCTCCTCGACATGGCAATGATTCTTTATTTAAACCTTCTCCCATCAGCTTTCCACTTGGAATC  
AGTATATGTGCAGGATGTAATGCTGAGATTGGCCATGGAAGATTTTTAAGCTGCATGGGAGG  
TTTATGGCATCCACAATGCTTCTGCTGCCATGCTGATGATTGCCATCTGCCAATCACTGATTAT  
GAGTTTTCCATGTCTAGCAACGGTCTTACCATAAAGCTTGCTACAGGGAGAAGCATCACCCA  
AAATGTGGTGTGTTGCAAGAATTTTATCCCTGCCAATTCAGCTGGCCTCATTGAGTATAGAGTT  
CATCCTTTCTGGCTACAAAAATACTGCCCGACACATGAGCTCGATGGCACTCCTCGTTGTTAC  
AGCTGCAGAAGAATGGAGCCAAAGGATTCAAAATATATTTTGTGTTGATGATGGTCGAAAGCT  
TTGTCTCGATTGTCTAGACTCCGCAATTATGGATAGTCATGAATGCCAACCTCTTTACCTTGAA  
ATACTAAAATTTTATGAAGGTTTAAATATGAAAATGGAGCAGCAAGTATCTATGCTTTTGGTC  
GAGAGACAAGCACTTAATAAGGCCATGGAAGGAGAAAAGAATGGTCATCACCATTTACCTGA  
AAGTAGAGGACTCTGCTTGTCTGAAAAGCAAACACTGTCACCACAATTTAAGAAGACCGTGGA  
TTGGGGCAGAAAGACGAGCCACAGACATGATAACCGAGCCTTATAGATTGACTCGTCGTTGT  
GAAGTGACAGCCATTCTGTTTTGTATGGCCTTCTAGGTTGTTGACAGGATCAATCCTAGCT  
CATGAGATAATGCATGCATGGTTAAGGCTTAAAGGTTATCCCAACCTGAGTCCAGAAGTTGA  
AGAAGGAATCTGCCAAGTCTTGGCTCATCTGTGGTTAGAATCAGAAATCTTTTCTGGTTCTGC  
CAATAATATTGATGCACCATCTTCTTCTTCATCGAAGAAGGGTAAACGGTCTGATTTTGAGAT  
GAAACTCGGTGATTTTTTCAAACACCAAATTGAGACAGATACCTCATCAGCCTATGGAGATG  
GATTCAGATTAGGCAATCAGGAAGTACTTAAGTATGGACTTAAAAGTACCCTTGATCATATCC  
TTTGA

>Cr\_25683.1|Cr\_LG\_8:207661-213091|minus|

MDLLSGGAVGAVMGEIVKHDIQTIKKGRDFGPTLEMNIETLNTLAPLVEEMKRYSDLLDRPRDEI  
ERLEKHIREGQELVTKSKLNRWKFPSPRYQSKLQKKDEALQRHLSVNVQGLIGAPEELECLGM  
VEPLNKLKIELLKDGVSVLVLTSLGGSGKSTLAKKICWDPQIKGKFDGNIFYVTVSKTPNLNNIVK  
TLFEHCGSQVPEFQSDDAIKQLRHLLRKEDLKGGKFVEEESQSEDEHLCEIDEEEDRNQVWPEK  
DGNHGKVRLEHEDDELLAKFQDENQRRAKDQLEEDEQLARTIQESLNIGSPPRHGNDLFLKPSISF  
PLGFSICAGCNAEIGHGRFLSCMGGLWHPQCFCCHADDCHLPITDYEFMSSSNGPYHKACYREKH  
HPKCGVCKNFIPANSAGLIEYRVHPFWLQKYCPTHELDGTPRCYSCRRMEPKDSKYILLDDGRKL  
CLDCLDSAIMDSHECQPLYLEILKFYEGLNMKMEQQVSMMLLVERQALNKAMEGEKNGHHHLPES  
RGLCLSEKQTVTTILRRPWIGAERRATDMITEPYRLTRRCEVTAILVLYGLPRLLTGSILAHEIMHA  
WLRLKGYPNLSPEVEEGICQVLAHLWLESEIFSGSANNIDAPSSSSSKKGRSDFEMKLGDFFKHQ  
IETDTSSAYGDGFRLGNQEVLYGLKSTLDHIL

>Cr\_25684.1|scaffold1496:50823-53723|plus|

ATGGGGAAAGAAATTGTCAGACAAGAATCACCAGAAGAGCCTGGAAATCGCAGTCGGTTAT  
GGCTCCCTAAAGATATAGTTCAAGTTCTAGAAGAAAATACGGGAACAAGTAAAATTGAAATC  
ATATGTTCAAACCTCCCGGATTAAGTAGAATGGGATGGAGAGGCTTCAAGAAGATGAGAAA  
GCTTAGAACACTAATTATGAGTGGCAGATGCAGTGAAAGTCCCAAACATCTTCCGAATAGCC  
TAAGAATACTTCAAATTGAAAATTGGATATGTTCTTCATGGGGTTTACCGTCTGAGTTTTATCC  
AAAGGAACTTACCACATGCAATTTCCCTCTTACTTATCATCATTTCGAGTTCAAAGACTTTTTC  
AAGAAGGCAAAAGTCGATGACTCTGTTGGGTTGTTGGGTAAACTTAAAACCTTAAATGCTTAT  
GGTTGCCTCAGGCTCAGGAAATTACCACCTCTCAAGTTGGTTTCCCTAGAAGAACTCAATCTT  
TCAGAGTGTTATCGTCTTGAGAGTTTTCCACCTGTGATAGATGAGTCGTTTGATAAACTTAAA  
ACCTTGAGTGTTAGATGTTGCTTCAAGATAAAGAGTATTCCACCTCTTAAGTTGACTTCGCTA  
CAAATACTCGATCTTTCACATTGTGATAGTCTCGAGAGTTTTCCAGTTGTGGCGAATGGCTTTC  
TTGGAAATCTTAAAACCCTGTTTGTAAAGGTTGTCGCAATCTCAAGATTATTCCACCTCTCA  
AGTTGGATTCCCTAGAAGAACTTGACCTTTCAGGTTGTGTTAGTCTCAATAGTTTTCCATGTGT  
GGTGGATGGCTTGTGGATAAACTTAAAATCTTGAGTATTAACATTGCATCAAACCTTACAAG  
TATTCCACCACTCAAGTTGACTTCGTTGAAACAGTTTGATCTTTCATATTGTCCAAGTCTAGAG  
AGTTTTCCAGAAATATTAGGAGAGATGAGAAACATAACCACAAATTAACCTGTTTAAACTCCC  
ATAAAAGAATTGCCGTTTCGATTTCAAATCTTACTCCGAGTCAAACATTAGATTCCTGTAAT  
TGTGGATTGTTCACCTTACCCTTAGTGTGCTCATGAGATGGTAAACTGGTTGAACTTACC  
ATCCATAGTGAAGAAAAAGTGAGTCCAATGAAATGTTCACTTGTAATAATCTTTGTCTCAGG  
AACATGAAACTTTCAGATGAATCTTTGTCCATATGTCTCATACTGTTTGCTAATGTGAAAGAA  
TTACTTAAATGAAAATCAATTCACAGTTCTTCTAAATGTATCGAAAAATGCAAATTTTAA  
TGGAGGCTTGTCTTGGATAATTGTGAGGAACTTCAAGAGATCAAAGGTATTCCGCCAAGCTTA



AAAACATTATCAGCATTA AACTGTAAATCATTGACTTCGTGAGCAAAGCAAAT TACTAAA  
TCAGGAATTACATGAGGCTGGAAACACTTGGTTCCGTTTGCCACGAGCAAAGATTCCAGATT  
GGTTTGATCACCAATGCTTGGCAGGATTGTCAATTTCTTTCTGGTTTCGTAACAAGTTTCCCGC  
CATAGCTCTTTGTGTTGTTTCGCCGTTGACATGGTATGATCATCGACCTCCTATAAAAGTGATC  
ATCAATGGCAATACATTTTTTTATAAACACGGTAATATGGACAAAGCACTTTTAGAAAATAAG  
TGGAATCATGCAGAGGTTGACTTTGGATTCCCATTCATTATAGTGGAATTCACGTATTGAAA  
GAGAAAAGTGAGATGGAGGTTATTTCGATTCACCAACCCAGAAAATGATGATAATATTGAGCT  
CACTCTTTAA

>Cr\_25684.1|scaffold1496:50823-53723|plus|

MGKEIVRQESPEEPGNRSRLWLPKDIVQVLEENTGTSKIEIICSNSRIKVEWDGEAFKKMRKLRTLI  
MSGRCSESPKHLPLNSLRILQIENWICSSWGLPSEFYPKELTTCNFPSYLSSEFEKDFFKKAKVDDSV  
GLLGKLTNAYGCLRLRKLPLKLVLEELNLSECYRLESFPPVIDESFDKLTLSVRCCFKIKSIP  
PLKLTSLQILDLSHCDSLESFPVVANGFLGNLKTFLVKGCRNLKIIPPLKLDSEELDLSGCVSLNSF  
PCVVDGLLDKILSIKHCIKLT SIPPLKLTSLKQFDLSYCPSLESFPEILGEMRNIPQINL FNTPIKEL  
PFRFQNLTPSQTLDSCNCGFVHLPLSVAHEMVKLVELTIHSEEKVS PMKCSLVKYLCLRNMKLSD  
ESLSICLILFANVKELHLNENQFTVLPKCIKCKFLWRLVLDNCEELQEIKGIPPSLKTLSALNCKSL  
TSSSKSKLLNQELHEAGNTWFRLPRAKIPDWFHDHQLAGLSISFWFRNKFPALCVVSPLTWYD  
HRPPIKVIINGNTFFYKHGNMDKALLENKWNHAEVDFGFPFHYSGIHVLKEKSEMEVIRFTNPEND  
DNIETL

**Text S2.** Sequence alignment of Rgene orthologues in cultivated and wild chickpea. Peptide and CDS sequences were aligned using ClustalW. Functional annotations are mentioned at the top of the box. Cr represents *C. reticulatum*, Ca represents *C. arietinum* ICC4958 (*desi*). GenBank accession numbers (XM) are used to denote genes of chickpea CDC Frontier (*kabuli*).

### Cr\_03218

|                 |                                                                       |
|-----------------|-----------------------------------------------------------------------|
| Cr_03218.1      | GAGATCCTTGCCGGAAGGTATCC-----                                          |
| XM_004490520.2  | GAGATCCTTGCCGGAAGGTATCCGACACCTCACTTCACTTGAGGTTTTGACTATTCATGG          |
| Ca_03824.1      | GAGATCCTTGCCGGAAGGTATCCGACACCTCACTTCACTTGAGGTTTTGACTATTCATGG<br>***** |
| Cr_03218.1      | -----GACACCTCACTTCACTTGAGGTTTT                                        |
| XM_004490520.2  | ATGTGAAGGATTGAGATCCTTGCCGGAAGGTATCCGACACCTCACTTCACTTGAGGTTTT          |
| Ca_03824.1      | ATGTGAAGGATTGAGATCCTTGCCGGAAGGTATCCGACACCTCACTTCACTTGAGGTTTT<br>***** |
| CrTC11513       | GAGATCCTTGCCGGAAGGTATCC-----                                          |
| Ca(ICC2)TC15631 | GAGATCCTTGCCGGAAGGTATCCGACACCTCACTTCACTTGAGGTTTTGACTATTCATGG<br>***** |
| CrTC11513       | -----GACACCTCACTTCACTTGAGGTTTT                                        |
| Ca(ICC2)TC15631 | ATGTGAAGGATTGAGATCCTTGCCGGAAGGTATCCGACACCTCACTTCACTTGAGGTTTT<br>***** |

### Cr\_10687

|                 |                                                                    |
|-----------------|--------------------------------------------------------------------|
| Cr_10687.1      | CATGGATGTGTCTCAACATCATCAT-----CATCATCATGGTGGATACATAGCTAA           |
| Ca_09490.1      | CATGGATGTGTCTCAACATCATCATCATCATCATCATCATGGTGGATACATAGCTAA          |
| XM_012715315.1  | CATGGATGTGTCTCAACATCATCATCATCATCATCATCATGGTGGATACATAGCTAA<br>***** |
| CrTC26991       | CATGGATGTGTCTCAACATCATCAT-----CATCATCATGGTGGATACATAGCTAA           |
| TC01626         | CATGGATGTGTCTCAACATCATCATCATCATCATCATCATGGTGGATACATAGCTAA          |
| Ca(ICC2)TC36519 | CATGGATGTGTCTCAACATCATCATCATCATCATCATGGTGGATACATAGCTAA<br>*****    |
